# Supplementary material for: Understanding of the characteristics of fibroblasts in ischemic cardiomyopathy using single-nucleus RNA sequencing
Source: Sci Rep. 2025 May 30;15:18964. doi: 10.1038/s41598-025-00260-7 (PMC12125171; doi:10.1038/s41598-025-00260-7)
Supplement: Supplementary file 7 — Supplementary Material 7 [file 41598_2025_260_MOESM7_ESM.xlsx]

## Sheet: Supplementary Table 1
Supplementary Table 1.The list of FB3-related differentially expressed genes between the ICM and control groups
Cluster	Gene	Pvalue	log2FC	Qvalue
Normal	SERPINE1	2.74965910359148e-112	2.98428304539475	7.57998525087063e-108
Normal	GBE1	2.48215919897591e-201	2.61959411314032	6.84256826381689e-197
Normal	NAV2	7.05111553763182e-147	2.49666487116537	1.94378102025896e-142
Normal	MGST1	2.43755424173588e-152	2.27117361907269	6.7196057781933e-148
Normal	PLA2G5	7.89998393559269e-185	2.25970585665492	2.17778857152484e-180
Normal	SPOCK1	2.41800259999779e-163	2.22381250259617	6.66570776741391e-159
Normal	AP002518.2	1.33919166209514e-140	2.03969531171882	3.69174965489768e-136
Normal	CFD	1.46661012460114e-93	1.91956051471429	4.04300413048795e-89
Normal	TXNRD1	1.09174635845544e-97	1.89546713948326	3.0096171863541e-93
Normal	KAZN	6.09652928467291e-91	1.89409410286308	1.68063022790578e-86
Normal	HIF3A	8.8273185892623e-94	1.82923	2.43342691550194e-89
Normal	NFATC2	1.81364860456437e-34	1.7929747550613	4.9996851082026e-30
Normal	FN1	5.62388092396566e-59	1.72847871990655	1.55033525430961e-54
Normal	ADH1B	1.89243579822205e-50	1.61722230904115	5.21687776495874e-46
Normal	ACSM3	2.64477893560273e-111	1.60628222972907	7.29086209177604e-107
Normal	APOD	1.50536878471244e-65	1.59678457470321	4.14985012881678e-61
Normal	ACSM1	7.35268328082471e-69	1.53613487737543	2.02691420002495e-64
Normal	THUMPD1	6.96167702172613e-69	1.47043177747531	1.91912550457924e-64
Normal	ADGRB3	3.04355919768773e-102	1.43001357858577	8.39017964026578e-98
Normal	ELN	1.27421757490901e-63	1.42458066482202	3.51263558875167e-59
Normal	DEC1	6.24792573640226e-09	1.40464723732198	0.000172236568775401
Normal	VIT	4.43620636871503e-53	1.36214656957535	1.22292900966367e-48
Normal	FKBP5	1.65689867511218e-94	1.33998449943979	4.56757257768175e-90
Normal	NLGN1	6.20908038900012e-43	1.33404369399522	1.71165719083566e-38
Normal	MAMDC2-AS1	7.79528924114305e-52	1.33011739728308	2.1489273851059e-47
Normal	ITGAV	8.93330365349209e-56	1.32994206813806	2.46264381815816e-51
Normal	AC104574.2	1.8165856689773e-44	1.31175848925317	5.00778171366973e-40
Normal	NEGR1	1.87127932507373e-96	1.2694084006568	5.15855571543075e-92
Normal	CBLB	3.57357187666076e-77	1.24583670138107	9.85126559239072e-73
Normal	TGFBR3	4.76377740108258e-54	1.24194906788253	1.31323051615644e-49
Normal	MAMDC2	2.23576388659661e-56	1.23980973733671	6.16333030618087e-52
Normal	NNMT	3.14918143545449e-48	1.23783417380707	8.6813484631174e-44
Normal	ZBTB16	2.35442735788585e-91	1.19204736595371	6.49044989748393e-87
Normal	AL356124.1	4.89612666108949e-49	1.16153678088417	1.34971523666254e-44
Normal	ABHD15-AS1	3.69337151862423e-34	1.1448094944792	1.01815172653914e-29
Normal	UBE2H	4.55747095951625e-41	1.14182668972369	1.25635801940984e-36
Normal	SERPINA3	1.30852410538151e-48	1.12844365014173	3.6072084013052e-44
Normal	AL357873.1	8.36545872277244e-38	1.12437379022652	2.30610600610668e-33
Normal	TNC	1.06001457362421e-06	1.12254562551852	0.0292214217510987
Normal	CYP4B1	2.78996739593393e-45	1.10564696762086	7.69110312037108e-41
Normal	EDNRB	2.1485397052567e-41	1.10556233548318	5.92287940548115e-37
Normal	GALNT15	4.18149027720327e-31	1.09997553574405	1.15271142471663e-26
Normal	SSH2	3.74302413087929e-53	1.09807656344227	1.03183946215949e-48
Normal	RPS6KA2	1.29566290017515e-44	1.0955	3.57175391691285e-40
Normal	SPARCL1	1.6445559566814e-81	1.09500907861312	4.53354740578362e-77
Normal	HIPK2	6.44171526665667e-43	1.08338591549211	1.77578764755924e-38
Normal	C1R	2.26794811791104e-34	1.07360399242788	6.25205257664536e-30
Normal	HSPA5	1.82640111741158e-37	1.07287341452792	5.0348399603685e-33
Normal	PID1	1.34792744039795e-67	1.07044544854911	3.71583157494503e-63
Normal	TIMP1	9.37931370429068e-37	1.05620157322763	2.58559540886181e-32
Normal	ITGA5	1.8233809991493e-37	1.05608702060244	5.02651440035488e-33
Normal	SLC19A2	4.23117426817957e-32	1.05063429537333	1.16640781050906e-27
Normal	LINC01088	7.95326568898693e-22	1.04311562023446	2.19247675248303e-17
Normal	CATSPERB	5.15648351133415e-28	1.02442590512627	1.42148780956949e-23
Normal	SRPX	3.82139591889456e-34	1.02053546034559	1.05344421296166e-29
Normal	PXDNL	1.79709845673402e-32	1.02006685762353	4.95406131567867e-28
Normal	CCN2	1.31509284302962e-28	1.01090440386709	3.62531644037976e-24
Normal	SYN3	6.33039389464668e-28	1.00959278424135	1.74509968493725e-23
Normal	CRLF1	2.49090025425507e-29	0.997342475333254	6.86666473090495e-25
Normal	CCL2	9.71208098495315e-34	0.990481151723303	2.67732936512203e-29
Normal	TMEM132C	1.4989286301134e-25	0.99045369644226	4.13209655463361e-21
Normal	STXBP6	1.11432979652358e-32	0.980822393659277	3.07187295007656e-28
Normal	NID1	1.40710295846736e-37	0.979485848986849	3.87896072560697e-33
Normal	HSP90B1	1.06818947401294e-31	0.951064964583093	2.94467792301147e-27
Normal	ATP13A3	3.31810595903765e-35	0.945749264541863	9.14702269727909e-31
Normal	MMP19	7.73656610099292e-27	0.941958766636961	2.13273917706072e-22
Normal	PTPRG	1.66132928515167e-80	0.938123452414773	4.57978644037761e-76
Normal	ABCA9-AS1	2.13610061093883e-33	0.923839620474213	5.88858855417507e-29
Normal	KANK1	6.71798415233368e-35	0.922494122442961	1.85194669127383e-30
Normal	CTSC	3.02710652482802e-33	0.917811014400881	8.3448245569934e-29
Normal	TIMP3	1.27490594973649e-28	0.914735722019373	3.51453323163857e-24
Normal	APCDD1	5.79888432841258e-30	0.912222451373975	1.59857844281349e-25
Normal	PDE3B	9.114999875191e-23	0.902674882212157	2.5127320155939e-18
Normal	PITPNC1	1.83392373640672e-18	0.902121583182051	5.05557756415241e-14
Normal	SERPING1	3.65229718012762e-24	0.895749717064541	1.00682876364578e-19
Normal	GFPT2	9.40829558628187e-24	0.889945888320497	2.59358484427032e-19
Normal	NOVA1	1.03288028050519e-26	0.883203116697061	2.84734106926866e-22
Normal	AC017002.5	9.00753136093388e-22	0.877157343522166	2.48310617026864e-17
Normal	TBC1D4	2.92654662990436e-31	0.871379150504335	8.06761109465734e-27
Normal	USP53	5.50187108275275e-23	0.860799513742445	1.51670080138245e-18
Normal	SLC39A14	4.27104724144862e-24	0.855315775738651	1.17739959305014e-19
Normal	BACH1	1.63324553479767e-28	0.846066816949112	4.50236796577675e-24
Normal	TNFRSF19	9.14374982108733e-24	0.844729829897584	2.52065751317914e-19
Normal	IL1R1	2.10094343036092e-23	0.841448233752945	5.79167075447594e-19
Normal	PIR	1.7596527579756e-25	0.84114412180434	4.85083475791133e-21
Normal	DOCK5	6.50303580039757e-21	0.840118153872837	1.7926918790956e-16
Normal	MT-CO1	1.1281699169675e-22	0.838863626219166	3.11002601010431e-18
Normal	MAP3K20	4.85889107357659e-28	0.837691679895139	1.33945050225286e-23
Normal	AKR1C1	8.02434220272512e-23	0.831498914158032	2.21207041502523e-18
Normal	CCN1	1.54671292736286e-14	0.822951793966094	4.26382352686119e-10
Normal	SLC2A13	7.51566001852024e-22	0.822589846321276	2.07184199730547e-17
Normal	NEAT1	1.50480658011229e-54	0.820808492178962	4.14830029939556e-50
Normal	ST3GAL6	8.82354198635641e-32	0.817792523625272	2.43238581937887e-27
Normal	RABGAP1L	9.27092574350126e-29	0.812182108704706	2.55571609971099e-24
Normal	C7	8.86104775121495e-39	0.804607124987953	2.44272503357743e-34
Normal	AC017101.1	6.78922506823388e-30	0.804463092851911	1.87158567456003e-25
Normal	LINC01807	3.61092153978068e-13	0.80433531567829	9.95422740871341e-09
Normal	MRTFA	1.3420060027374e-29	0.80374399871208	3.6995079477462e-25
Normal	NLGN4X	1.36584270614653e-13	0.803097670029001	3.76521858803414e-09
Normal	TWIST2	1.75170920835965e-21	0.800677686372215	4.82893677468505e-17
Normal	C12orf40	2.15828519283919e-21	0.798521895584933	5.9497447910998e-17
Normal	LAMA2	8.69356050177088e-132	0.79210376299158	2.39655382352318e-127
Normal	CDH19	1.32816524941613e-33	0.785940408798619	3.66135314306543e-29
Normal	ACSL1	3.97337379275123e-27	0.774797346557693	1.09533995344773e-22
Normal	RIPOR3	1.79177817913621e-17	0.774617634936862	4.93939490642478e-13
Normal	GGT5	1.51709084189323e-22	0.772733251971325	4.18216432384706e-18
Normal	RBMS3-AS2	1.58131975626069e-21	0.770209736245856	4.35922417208386e-17
Normal	AL513327.1	3.70679306810754e-21	0.768001568694649	1.02185164508521e-16
Normal	MT-ND6	1.22985169609955e-25	0.767244502025082	3.39033217063764e-21
Normal	MARCH3	1.41304618205134e-15	0.76194689321897	3.89534441006092e-11
Normal	PDGFRB	2.56220562110184e-18	0.760545501937159	7.06323223569144e-14
Normal	TC2N	1.75411260795442e-14	0.759580974623567	4.83556222634796e-10
Normal	PLCXD3	1.83941962477435e-14	0.756414667630064	5.07072807961545e-10
Normal	ERI2	7.85716518774569e-16	0.750260087992892	2.16598472730585e-11
Normal	TFPI	3.14933326938398e-29	0.747943477285455	8.68176702371083e-25
Normal	CLSTN2	1.86767681154969e-14	0.7467936550277	5.14862466639904e-10
Normal	CAMKMT	5.76767001360889e-23	0.746714405466611	1.58997359265156e-18
Normal	TNIK	7.69621580660573e-23	0.74352496050369	2.121615811407e-18
Normal	JADE1	5.75178975768368e-19	0.741937559503274	1.58559588250066e-14
Normal	UBAC2	1.23229046880406e-21	0.741425008435756	3.39705513535216e-17
Normal	FILIP1L	1.10056301589193e-21	0.741335350470294	3.03392206590928e-17
Normal	ABCC1	4.59494750663755e-21	0.741212050134643	1.26668917915477e-16
Normal	MSI2	1.95823773590804e-22	0.740059105552452	5.39827396657769e-18
Normal	WNT5B	6.65783435133038e-19	0.739679813558563	1.83536519563125e-14
Normal	NGF	8.24074521582925e-17	0.736974601822621	2.27172623364765e-12
Normal	ARL15	2.00068450059813e-28	0.734494725391106	5.51528696279886e-24
Normal	ECE1	2.84607783565095e-19	0.734471245761979	7.84578276953898e-15
Normal	SLC16A12	1.96951549907728e-18	0.732322511454117	5.42936337630635e-14
Normal	PDE7A	1.30575574481612e-18	0.729599867746837	3.59957686173459e-14
Normal	CLMN	2.14927777891131e-22	0.729580070706117	5.92491405312481e-18
Normal	PHLDB2	4.08447303977748e-23	0.727835218447143	1.12596668287546e-18
Normal	STEAP4	5.28846094705017e-11	0.724969413563508	1.45787002927332e-06
Normal	DCN	1.90316946252207e-47	0.724659683332314	5.24646725733459e-43
Normal	PKNOX2	8.15965392164242e-17	0.724120102583688	2.24937179657917e-12
Normal	AC093535.1	1.89802063856747e-16	0.723971752813123	5.23227349433895e-12
Normal	CUX1	8.70118563527879e-28	0.721631441344178	2.3986558440773e-23
Normal	CELF2-AS2	5.06025680458426e-20	0.721090438634007	1.39496099331974e-15
Normal	FOXO1	2.36400867413848e-29	0.717876899207124	6.51686271199754e-25
Normal	KCNQ1	1.40916573008736e-21	0.716338449744647	3.88464716813183e-17
Normal	HIVEP3	5.59582298641549e-21	0.707399837482045	1.54260052266516e-16
Normal	SH3D19	1.20475143059707e-23	0.700288498329773	3.32113826872694e-19
Normal	EPHA6	3.90859477290693e-14	0.69709918789311	1.07748232104725e-09
Normal	CSNK1A1	8.92606536983586e-22	0.696885815398323	2.46064844050265e-17
Normal	CELF2	3.18368352111069e-29	0.696707311289528	8.77646036264583e-25
Normal	COL4A1	2.12132334556236e-24	0.694127074945562	5.84785206671175e-20
Normal	BCL2	9.14896715854902e-12	0.687795725572544	2.52209577659721e-07
Normal	AC004381.1	1.22832451671341e-19	0.683794932477893	3.38612219522386e-15
Normal	ATP1B3	1.40500298227377e-16	0.683644951595792	3.8731717212341e-12
Normal	WASF3	8.49051801257886e-13	0.678685540369057	2.34058110052761e-08
Normal	SAMHD1	2.10312147052003e-13	0.67733887577167	5.79767495778257e-09
Normal	LINC00513	1.08429878863212e-16	0.675796265345115	2.98908647062216e-12
Normal	CALR	1.35290545838854e-17	0.673993802608829	3.7295544771397e-13
Normal	DDR2	1.93285645424876e-16	0.669885760636716	5.32830538742756e-12
Normal	PSME4	4.563369988904e-15	0.664618862501561	1.25798420484117e-10
Normal	FBLN2	2.7484558442696e-15	0.660289665283778	7.576668225898e-11
Normal	AC119674.1	3.42155078547152e-11	0.656940263380233	9.43218905030935e-07
Normal	MECOM	4.80714548308804e-27	0.656310069694641	1.32518579532288e-22
Normal	TANK	4.80236465322674e-18	0.65550127445944	1.32386786395502e-13
Normal	COL4A2	9.65762298169873e-22	0.654003906486557	2.66231692736489e-17
Normal	FMO2	1.00523807762735e-11	0.651351440363987	2.77113980859533e-07
Normal	DIAPH2	4.32322877379299e-20	0.650834887321031	1.19178447607151e-15
Normal	MUSK	3.35069807461489e-12	0.645593025173368	9.23686938229085e-08
Normal	ZRANB2-AS2	3.27891441449988e-13	0.645427309803272	9.03898336645183e-09
Normal	AP002989.1	1.15609284223211e-13	0.644949622863846	3.18700113818124e-09
Normal	PTPRK	4.5349873018545e-13	0.644584729160898	1.25015994950223e-08
Normal	NCOA2	3.81877523219559e-22	0.643877092716956	1.05272176825936e-17
Normal	SMIM3	1.15849724189866e-18	0.63647374420908	3.19362934674203e-14
Normal	C3	4.33448803882487e-20	0.634842986049207	1.19488831766285e-15
Normal	TRABD2B	3.22331751079246e-14	0.62802169400084	8.88571938200156e-10
Normal	RFX2	1.68927986646349e-09	0.626501997728008	4.6568378078799e-05
Normal	MAN1A1	8.10703963901113e-13	0.626140505968752	2.2348676172862e-08
Normal	AXL	3.90491728201528e-13	0.625610345551689	1.07646854713315e-08
Normal	RASSF4	1.06536620544872e-11	0.624113665508382	2.93689501856047e-07
Normal	PRELP	1.98303821372336e-13	0.624088553283031	5.46664144377119e-09
Normal	EYS	8.29728702179448e-13	0.623387926110157	2.28731311329808e-08
Normal	LTBP1	1.30631868695171e-23	0.620335005875661	3.60112872431977e-19
Normal	PDGFRA	8.16850696688339e-17	0.61854312158461	2.25181231556074e-12
Normal	FBLN5	3.93259902926609e-16	0.616484490867867	1.08409957439778e-11
Normal	AC007319.1	2.55262936075022e-27	0.614608278968377	7.03683335878013e-23
Normal	FNDC3B	1.82451201597312e-40	0.611142465020379	5.02963227443311e-36
Normal	SCARA5	9.27331390991459e-13	0.607280154227163	2.55637444554615e-08
Normal	DACH1	3.19709077887629e-16	0.60694850491607	8.81342015012827e-12
Normal	CD63	7.64478441776605e-14	0.605968065589164	2.10743772044557e-09
Normal	C1S	6.32912650622345e-12	0.604102060158086	1.74475030397062e-07
Normal	ELF1	2.8578694918127e-22	0.603651112125459	7.87828882808006e-18
Normal	AC005237.1	4.50672894998539e-12	0.601102037804009	1.24236996964247e-07
Normal	ARMC8	4.94645644721088e-17	0.600445453396511	1.36358964880262e-12
Normal	LPP	1.3407529029996e-28	0.599578592159006	3.69605352769901e-24
Normal	CLIP4	6.80704003627212e-13	0.599340597533179	1.87649672679914e-08
Normal	BCL6	9.37223266927582e-09	0.598615752052033	0.000258364337993926
Normal	ADGRD1	5.78318918309884e-12	0.596171567268907	1.59425176210486e-07
Normal	EMP1	1.34700861419448e-08	0.592456480565688	0.000371329864674994
Normal	CALCRL	8.33138959591352e-12	0.592226491269619	2.29671416990548e-07
Normal	USP15	1.41975809760562e-20	0.586864193744915	3.91384714766941e-16
Normal	GRK5	3.32502177410728e-17	0.58531363010543	9.16608752468153e-13
Normal	ADIPOR2	2.27815896015162e-12	0.584489133062881	6.28020080544996e-08
Normal	RASAL2	4.05515772834538e-12	0.583036247160153	1.11788533097297e-07
Normal	VGLL3	5.67080977129539e-12	0.581612809333162	1.563272129653e-07
Normal	ATP2C1	3.21039436406934e-15	0.578468281115615	8.85009414342995e-11
Normal	PAMR1	1.37755559410726e-09	0.578280043328932	3.79750750627549e-05
Normal	AC097662.1	2.9455380668059e-11	0.577057895298194	8.11996478876383e-07
Normal	KIAA0040	2.16440897387586e-11	0.575148238790791	5.96662621828359e-07
Normal	TBC1D16	1.36550197825887e-10	0.574472831688905	3.76427930346622e-06
Normal	MKLN1	2.6954641387161e-17	0.574368625597844	7.43058599119867e-13
Normal	MYH13	2.38239330270161e-13	0.57410712357276	6.56754361755753e-09
Normal	SEPTIN9	1.40267832271458e-13	0.571572905501164	3.86676333222728e-09
Normal	SORCS1	1.06693714469543e-10	0.570555290661326	2.94122562678189e-06
Normal	PCSK6	1.81043447917723e-13	0.568699180089248	4.99082472874786e-09
Normal	IGFBP4	3.84496900316363e-11	0.566563640774529	1.05994260510212e-06
Normal	RHOQ	3.41740906546669e-11	0.566248913032242	9.42077157077202e-07
Normal	NEK7	1.54717675479825e-12	0.56596445941289	4.26510215995232e-08
Normal	ADAMTS5	2.50466066934307e-11	0.565688795454762	6.90459806717803e-07
Normal	NFATC1	8.44570940226474e-10	0.562159828184648	2.32822871092232e-05
Normal	ANKS1B	1.83958135920748e-18	0.561088575623941	5.07117393292725e-14
Normal	SND1	4.11843501035543e-15	0.560112062921685	1.13532897930468e-10
Normal	SMC5-AS1	2.14256728080695e-13	0.559044491773296	5.90641522300052e-09
Normal	SERPINF1	3.06762284838529e-13	0.558366663162487	8.45651590614374e-09
Normal	RCN1	1.19273885322466e-15	0.555102267098646	3.28802319668441e-11
Normal	UGDH	1.92755793144102e-12	0.554778922880963	5.31369894960345e-08
Normal	FBXL7	1.1089051287791e-20	0.55410185453951	3.05691876850534e-16
Normal	EXOC6B	3.14828464963945e-12	0.553140409947325	8.67887629366106e-08
Normal	PHC2	3.0015673525103e-08	0.549474573733269	0.000827442072066514
Normal	RAB8B	2.13497423526011e-11	0.549263928621915	5.88548347434153e-07
Normal	COL6A3	3.2115667680421e-26	0.540713558035876	8.85332610946166e-22
Normal	ACSL4	2.75564968858857e-07	0.539880500098584	0.00759649949653211
Normal	TGFBR2	4.36524445711847e-13	0.539551858323193	1.20336693949385e-08
Normal	PAPPA	9.94536984414523e-08	0.539027571277279	0.00274164010493551
Normal	COL4A4	3.15831114103666e-13	0.537484206021137	8.70651632249576e-09
Normal	SNX13	2.85164281414579e-11	0.536851843222194	7.86112374575571e-07
Normal	RBMS3-AS3	1.36419253669308e-10	0.53682760026391	3.76066956590182e-06
Normal	AL355612.1	3.98665021568594e-12	0.534390196164713	1.09899986495814e-07
Normal	SCFD2	3.57327911231155e-11	0.53286688905192	9.85045852890926e-07
Normal	MGP	9.06849220496777e-18	0.530992954606742	2.49991124614347e-13
Normal	PVT1	2.43689957668903e-11	0.53019102444187	6.71780106305864e-07
Normal	UAP1	7.35376857966912e-09	0.528120466630564	0.000202721338435739
Normal	MT-CO2	5.57301070131227e-08	0.522464144249571	0.00153631186003075
Normal	VMP1	3.4855950229579e-10	0.521274021401157	9.60873979978805e-06
Normal	RTN4	6.34462270307178e-14	0.520533521301848	1.7490221405558e-09
Normal	SNED1	7.70233831631111e-07	0.51898057203864	0.0212330360365748
Normal	ZBTB20-AS5	5.15655644306401e-10	0.517003402252692	1.42150791465946e-05
Normal	SEC61A1	2.11594863953441e-11	0.515835268899196	5.8330356146045e-07
Normal	GPHN	4.58983196220219e-15	0.514764572511407	1.26527897702028e-10
Normal	RMST	4.88701094016251e-09	0.512527038575689	0.00013472023058746
Normal	CMSS1	8.35681707431968e-10	0.510509788079296	2.30372376287771e-05
Normal	FAM214A	1.61364794342161e-10	0.506983830865761	4.44834328563035e-06
Normal	SIK3	3.8225166303561e-15	0.506588918117463	1.05375315949027e-10
Normal	SRPX2	1.1704656059412e-15	0.505476225446965	3.22662253589812e-11
Normal	INSR	1.72193898599397e-07	0.502528312494584	0.00474686920268957
Normal	MT-CO3	8.48849239806769e-10	0.502397781465462	2.34002269937532e-05
Normal	FBN1	5.09404819390876e-15	0.501246151594761	1.40427626561483e-10
Normal	XYLT1	1.00614267521244e-10	0.50093961679474	2.77363351275814e-06
Normal	LMO3	2.30496187061237e-07	0.499644263728836	0.00635408838871712
Normal	CORO2B	8.95181769224603e-09	0.496901309725426	0.000246774758322146
Normal	RASSF8	3.10667410678692e-08	0.496641337113175	0.000856416851017951
Normal	LAMC1	1.06947596775983e-19	0.493691938715911	2.94822440032352e-15
Normal	SESTD1	3.09489199839736e-09	0.493101846244269	8.53168877198201e-05
Normal	GPSM2	2.9648192473222e-12	0.492862648157105	8.17311721909311e-08
Normal	LIPA	6.31171764007017e-08	0.492524672341533	0.00173995120183814
Normal	YAF2	6.6585022086709e-11	0.492010170526087	1.83554930386431e-06
Normal	DIAPH2-AS1	9.60494471675849e-10	0.487405851175607	2.64779511006881e-05
Normal	ANKUB1	5.8998368622575e-11	0.485215964102344	1.62640802781853e-06
Normal	NFKBIZ	1.62251719060451e-07	0.482460273590219	0.00447279313933946
Normal	AC008440.2	1.94442236053289e-09	0.481332855683196	5.36018912128102e-05
Normal	LPAR1	3.00175184329605e-11	0.480914202950724	8.27492930641422e-07
Normal	RBMS3	1.31632184249814e-32	0.47976790870122	3.62870442321462e-28
Normal	OPHN1	2.705716163578e-08	0.475664551899835	0.000745884774813548
Normal	C1orf21	2.93245930350684e-11	0.47339480964509	8.0839105619773e-07
Normal	COL6A2	1.60369201256449e-09	0.465807908017317	4.42089777103653e-05
Normal	NPAS2	3.51811528604509e-07	0.464904970724555	0.0096983884090405
Normal	IRAK3	1.27441976071051e-08	0.463025880868273	0.000351319295435067
Normal	SPSB1	1.24057298576756e-07	0.460644531716971	0.00341988754986544
Normal	AKAP13	3.58990059554345e-21	0.456997384439651	9.89627897173462e-17
Normal	ABCA6	1.98144595839803e-11	0.455856651240267	5.46225207351585e-07
Normal	GPR135	1.38402393488912e-07	0.454120278204634	0.00381533878130885
Normal	PTPRM	1.89645638407469e-08	0.453036631488504	0.00052279613139787
Normal	MAP3K5	4.22629832746926e-07	0.453006464792092	0.0116506365993345
Normal	AC010894.3	9.58649826434301e-09	0.451493709834064	0.000264270997653144
Normal	PTGIR	8.88254027053845e-10	0.451466502758521	2.44864987637933e-05
Normal	REV3L	1.05510290443628e-09	0.448285393477915	2.9086021766595e-05
Normal	ADAMTS2	1.96200622148107e-10	0.446553901928231	5.40866255075687e-06
Normal	SCD5	3.71547183638476e-07	0.446257310225768	0.0102424412113619
Normal	ACSS3	3.54839516661119e-09	0.445478749275744	9.78186095579707e-05
Normal	EMILIN1	1.07082430914241e-10	0.444171304654199	2.95194137301289e-06
Normal	TAF1D	7.09561310391516e-09	0.443162212363507	0.000195604766435629
Normal	MCUB	1.09375239531607e-08	0.442083237025768	0.000301514722816782
Normal	PDE4DIP	9.25485121765463e-09	0.440977361559268	0.000255128483517085
Normal	SPARC	1.96867146799237e-10	0.440714299679719	5.42703663581457e-06
Normal	SMC5	1.83401980910504e-09	0.437796608110804	5.05584240775987e-05
Normal	EMP2	1.41878711888948e-07	0.435686858132882	0.00391117045064262
Normal	ACER3	1.22193387726456e-07	0.435448718385947	0.00336850511945521
Normal	KLF3	1.29176859093316e-08	0.434998100555721	0.000356101847462543
Normal	ABCA9	7.38375812688813e-07	0.434773497735787	0.0203548060283925
Normal	PLXNA2	4.49569381411366e-10	0.434042188230821	1.23932791373671e-05
Normal	IGF2BP2	1.1200566934534e-09	0.433598896269476	3.08766028684298e-05
Normal	DOCK4	1.19981897900443e-08	0.432328069702605	0.000330754097942152
Normal	IPO7	1.18805121758301e-06	0.431339890937311	0.0327510079151108
Normal	SSR1	2.6773824339068e-07	0.429844941575905	0.00738074015555087
Normal	RTN3	9.77304821539696e-08	0.428621969013408	0.00269413620153848
Normal	PMP22	1.99300282961973e-08	0.428418937393773	0.00054941109004127
Normal	MT-CYB	2.95229869323739e-07	0.427240835598148	0.00813860180764752
Normal	FSTL1	8.69346715317034e-11	0.426927034552175	2.39652809011447e-06
Normal	PABPC1	2.06353310990506e-09	0.422828423758816	5.68854172407528e-05
Normal	UGGT2	3.91110464427013e-10	0.422170393604883	1.07817421728595e-05
Normal	SLC25A12	1.55746633016543e-06	0.42192356121617	0.0429346743236704
Normal	SH3RF1	3.94388155027245e-07	0.4218473415492	0.0108720982696361
Normal	NBDY	8.25191450939802e-07	0.420184645611111	0.0227480527280575
Normal	QKI	9.22688535433569e-10	0.418727322966739	2.54357548562972e-05
Normal	LAPTM4A	1.3678091857538e-08	0.417595957291365	0.000377063958236749
Normal	MORF4L2	1.84334944493397e-08	0.415168919210965	0.000508156141484948
Normal	AC002463.1	1.23742137011504e-08	0.41340865257659	0.000341119949099613
Normal	YARS	5.34433169934649e-07	0.412538626596861	0.0147327191955885
Normal	ARMH3	7.48837358179341e-07	0.410834370638805	0.0206431994529299
Normal	MT-ND2	9.7360759381298e-07	0.40810288042323	0.0268394405386424
Normal	PLA2G4A	4.2153413555068e-08	0.406356776014378	0.00116204315147256
Normal	DCLK1	7.23871344491099e-09	0.404091157627075	0.000199549613535861
Normal	MAP4	1.67418217057496e-10	0.401939119448838	4.61521798962398e-06
Normal	TNS1	1.0886951818892e-09	0.401466588992654	3.00120600791396e-05
Normal	CANX	6.5646695037876e-08	0.401379368939829	0.00180968244210913
Normal	ELF2	1.56613009866953e-07	0.400792811815041	0.00431735084300228
Normal	LDLRAD3	4.93973620455678e-08	0.40058747009356	0.00136173707951017
Normal	USP54	9.12563594818334e-07	0.399693563808891	0.025156640618357
Normal	OSBPL9	2.64683856944733e-10	0.398320861125472	7.29653988439545e-06
Normal	CALU	8.05203268456667e-10	0.397818247562064	2.21970385015449e-05
Normal	PSMD14	8.47633099907633e-09	0.39614970576769	0.000233667016651537
Normal	CARHSP1	1.93346854192657e-07	0.395373917115564	0.00532999272952898
Normal	ZHX3	3.09656443460243e-08	0.395337777856033	0.000853629917686852
Normal	RAPH1	1.24940597946125e-07	0.394966144375594	0.00344423746358082
Normal	EFEMP1	4.49837673153411e-07	0.394645290184949	0.0124006751358201
Normal	MMP2	2.10498128437936e-07	0.391455184810896	0.00580280190664859
Normal	RORA-AS1	1.9591496277577e-09	0.389394847646101	5.40078777883966e-05
Normal	MBNL1	1.60247000361809e-10	0.38929425850671	4.417529058974e-06
Normal	RICTOR	5.57413076063581e-07	0.387278365955005	0.0153662062678447
Normal	P4HB	2.1643751542183e-08	0.386345816931259	0.000596653298763359
Normal	AGFG1	6.73224613728997e-09	0.380997789757673	0.000185587829266673
Normal	NID2	5.02219660046834e-07	0.379753100182836	0.0138446893685111
Normal	AC083870.1	1.24836071172334e-06	0.377732830551479	0.0344135597400774
Normal	ABCC4	2.07189294867358e-08	0.375963167194392	0.000571158729160846
Normal	DPT	3.47596398153283e-07	0.374944634873303	0.00958218990789156
Normal	WWP1	1.28573529331791e-07	0.372901897747106	0.00354438648308948
Normal	MFSD4B	6.20583483272234e-08	0.372476465155446	0.00171076248833657
Normal	ZFHX3	2.07148076651742e-08	0.372388833104575	0.000571045102905858
Normal	AP003086.1	2.98729650525481e-10	0.36837109315865	8.23508027603594e-06
Normal	ARIH2	6.31902402219693e-07	0.366851841603669	0.0174196535219903
Normal	PDIA5	3.99846794754455e-08	0.364546686690673	0.00110225765909961
Normal	HK1	4.03751099492812e-07	0.363064810099319	0.0111302065597183
Normal	AC012404.1	1.1540651856163e-06	0.36164407470848	0.0318141149718844
Normal	ACTR3	4.41294858404149e-07	0.36115640055257	0.0121651753616272
Normal	UGP2	1.53017593868476e-06	0.359453756663146	0.0421823601017228
Normal	ARHGAP32	7.34582892215916e-07	0.358335796724141	0.0202502465897162
Normal	AC087286.2	9.39093948543807e-08	0.357969389306058	0.00258880028795071
Normal	CECR2	3.96314222608661e-07	0.35675240469885	0.010925194174653
Normal	GXYLT2	6.04192256011149e-08	0.356567901033624	0.00166557679214593
Normal	SLMAP	1.34445346394846e-06	0.356527178056935	0.0370625486406673
Normal	EIF4A1	6.6913157272938e-07	0.352453528480226	0.0184459500654308
Normal	CARMIL1	2.33696520152841e-08	0.350846676879932	0.000644231197105338
Normal	IGF1R	1.08556067705e-07	0.349942379798784	0.00299256511842374
Normal	PMM2	6.53511662290399e-07	0.349807143194572	0.0180153559943594
Normal	EVI5	5.23140784158953e-08	0.349639363514534	0.00144214219969099
Normal	TRIM56	1.75702791485058e-06	0.343332158708599	0.0484359885286858
Normal	COL5A3	5.62833663224309e-08	0.340478048117578	0.00155156355941045
Normal	PDXDC1	2.49923407119895e-08	0.339775157914634	0.000688963856407415
Normal	AC008771.1	8.48831704209855e-07	0.336837123062332	0.0233997435899531
Normal	ZFAND3	1.94164374389357e-10	0.335211682608764	5.35252930879141e-06
Normal	AC068282.1	1.14278037271189e-06	0.331233454602563	0.0315030265345486
Normal	CST3	1.32344327708465e-07	0.329656566052831	0.00364833608193926
Normal	GSN	1.95053867912572e-18	0.325834938320471	5.37704997674586e-14
Normal	ATP6V0E1	9.01495502219153e-07	0.323432368435322	0.0248515265096754
Normal	ANKRD17	2.15320695554767e-10	0.323091817864149	5.93574561435827e-06
Normal	AC006001.2	1.39162566882107e-06	0.321940970696297	0.0383629448123905
Normal	RNF13	1.13663290064481e-07	0.320505589405522	0.00313335591720754
Normal	ERC1	1.77612738324052e-08	0.310745206328276	0.000489625035737913
Normal	CLIC4	1.71744219269693e-06	0.31063662385274	0.0473447289260762
Normal	LMAN1	1.12488584820535e-06	0.304707568385186	0.031009728177477
Normal	PALM2-AKAP2	1.25848701100628e-07	0.255757280603388	0.00346927114324102
ICM	NRXN3	4.08125875793609e-107	2.62491254451613	1.12508060180024e-102
ICM	KCNIP1	6.01740441389658e-75	1.99085879633846	1.65881787477887e-70
ICM	FGF14	1.78346041270356e-184	1.94046802029673	4.9164653196999e-180
ICM	LDLRAD4	1.1169728597394e-125	1.91818338477828	3.0791590824436e-121
ICM	FAM155A	1.95999684802121e-58	1.89415953540644	5.40312331094006e-54
ICM	NTM	2.72112398643221e-78	1.84956975533614	7.50132249339766e-74
ICM	THBS4	1.4222793552778e-86	1.84438043099008	3.9207974986943e-82
ICM	CCDC102B	6.60526521145094e-89	1.84200830824126	1.82087346084068e-84
ICM	AL445250.1	8.89166188921407e-95	1.78656915870891	2.45116443299964e-90
ICM	COL14A1	1.53163880041793e-82	1.75362935287809	4.22226868111212e-78
ICM	NRK	7.01916091383542e-77	1.74822767146527	1.93497208911701e-72
ICM	KCNMA1	9.25358388522213e-44	1.68104569876432	2.55093546963918e-39
ICM	MEOX2	3.71021777066558e-65	1.64280284492295	1.02279573283938e-60
ICM	TLL2	1.28333342580626e-48	1.6394447453512	3.53776525492011e-44
ICM	SLC44A5	7.97722329253589e-50	1.61142279896601	2.19908114505337e-45
ICM	PLEKHG1	1.58636229484509e-58	1.54625618436404	4.37312493819946e-54
ICM	POSTN	8.63597037556627e-82	1.52924822993184	2.38067795343235e-77
ICM	AC012636.1	1.905731987293e-50	1.52194721404144	5.25353136937061e-46
ICM	ITGBL1	1.8471518899392e-48	1.47435565183663	5.09204361499538e-44
ICM	PDZRN3	9.03937918347793e-64	1.47322161674415	2.49188565950936e-59
ICM	SMOC2	4.63230658837229e-58	1.46457673791163	1.27698795721659e-53
ICM	SEZ6L	1.02983711051081e-41	1.44738193911585	2.83895196254515e-37
ICM	SYNE1	2.33429757463743e-74	1.43326599897985	6.43495812400301e-70
ICM	ANK2	3.80359748616378e-57	1.43221416169527	1.04853771901077e-52
ICM	NIBAN1	2.98979273380716e-50	1.42770880587068	8.24196162928619e-46
ICM	UACA	1.13085316379288e-91	1.42727018561186	3.11742291662784e-87
ICM	LRMDA	1.80184211286493e-66	1.40985809578214	4.96713815253475e-62
ICM	IL1RAPL1	1.36510124044026e-85	1.39799789846531	3.76317458952166e-81
ICM	SGIP1	3.88610700607935e-75	1.34599656435919	1.07128311836589e-70
ICM	PPFIBP1	2.82439752360929e-79	1.34431779539943	7.78601665333373e-75
ICM	LINC00882	7.4521574650661e-46	1.31818745263239	2.05433624839477e-41
ICM	CADM1	1.06124350741825e-34	1.31541835841558	2.9255299768999e-30
ICM	SULF1	1.39605002109211e-53	1.31235572377381	3.84849109314462e-49
ICM	PLEKHH2	7.66516583269324e-56	1.3037204941871	2.11305626509854e-51
ICM	PLCB4	1.59480749010781e-67	1.30273927278701	4.39640580798021e-63
ICM	AC018742.1	6.39853691413121e-33	1.29869174497575	1.76388467111855e-28
ICM	EDIL3	5.04832853138145e-59	1.28784921568346	1.39167272624593e-54
ICM	AL590807.1	6.90692086108359e-37	1.28751594450761	1.90403087377491e-32
ICM	LUM	1.00925787736254e-30	1.28020900924487	2.78222119052533e-26
ICM	FHIT	2.54627096210408e-36	1.26291841963538	7.01930516123232e-32
ICM	FRMD4B	1.6865605303714e-51	1.26079201329444	4.64934141407484e-47
ICM	FREM1	8.66313191872776e-49	1.25950598560087	2.38816557603568e-44
ICM	AL365295.1	7.89358429990803e-51	1.24478677496287	2.17602438395565e-46
ICM	NR2F2-AS1	1.62812386499233e-48	1.23248298948363	4.48824905862436e-44
ICM	KIAA1211	1.2849835322368e-37	1.19222983957041	3.5423141033172e-33
ICM	SVIL	1.78945612332714e-75	1.16702397357863	4.93299369517592e-71
ICM	LINC02511	1.18948352939943e-26	1.14100119754828	3.27904924549542e-22
ICM	LIMCH1	3.6573794857528e-39	1.12874535544397	1.00822980283747e-34
ICM	LINC01482	9.36399874098482e-36	1.10895535052947	2.58137353292729e-31
ICM	PDE5A	5.75976435234341e-43	1.10127927921517	1.58779423901051e-38
ICM	RYR3	1.57005616767884e-31	1.09675805867878	4.32817383744025e-27
ICM	AC005165.1	8.97532711998044e-28	1.09090835983926	2.47422842716501e-23
ICM	PRKN	2.64742952943249e-49	1.08095840173134	7.29816898378654e-45
ICM	ANO1	5.55320212809877e-34	1.0780198248885	1.53085123065299e-29
ICM	MEF2A	2.61288055067127e-31	1.07215799101087	7.20292781403548e-27
ICM	GLIS1	4.83633566458175e-33	1.05807364006381	1.33323265265525e-28
ICM	DLGAP1	3.95892914108998e-24	1.05801915602917	1.09135799632427e-19
ICM	LAMA4	8.86616043806559e-39	1.0498450134787	2.44413444796154e-34
ICM	GNA14	2.95797192048912e-32	1.04653570781869	8.15424119321235e-28
ICM	CHSY3	1.54687080017471e-36	1.04595435200872	4.26425873484162e-32
ICM	AC107208.1	5.46358714204745e-33	1.04076242818564	1.50614706744822e-28
ICM	CPED1	3.42355834639657e-33	1.04029607879289	9.43772329351143e-29
ICM	MEOX1	1.16278946173709e-24	1.02584900324291	3.20546170917063e-20
ICM	SNCAIP	1.7560105160011e-31	1.00532806128583	4.84079418946022e-27
ICM	PLSCR4	6.1746112121236e-34	1.00011145282701	1.70215507284611e-29
ICM	EPHA3	7.30481871788895e-48	0.983893546985809	2.01371937596045e-43
ICM	ESR1	1.92752106048151e-29	0.982811185090972	5.31359730742939e-25
ICM	SYTL2	4.97311722122868e-30	0.971581405232212	1.37093922437611e-25
ICM	COL21A1	1.38663081355901e-21	0.966617219416979	3.82252516373812e-17
ICM	NAV3	1.17314973782956e-36	0.965403719314367	3.23402188227476e-32
ICM	SUGCT	4.50529954980928e-21	0.963065268100301	1.24197592689592e-16
ICM	BOC	2.3945819684187e-26	0.959521227476651	6.60114411233982e-22
ICM	FAP	1.28229625664978e-23	0.953200631232136	3.53490609070644e-19
ICM	COL4A5	2.97827361422642e-32	0.952569026959443	8.21020687233797e-28
ICM	PRELID2	1.2442915098983e-25	0.945833731352622	3.43013840533665e-21
ICM	DUXAP8	2.45220706942062e-29	0.944954739818711	6.75999922827184e-25
ICM	EDNRA	6.27378723170375e-26	0.943891991003732	1.72949492616377e-21
ICM	CYP1B1-AS1	1.71835096044499e-26	0.942503112139931	4.7369780926587e-22
ICM	CRPPA	1.245865823268e-27	0.941450181871714	3.4344783150029e-23
ICM	IGFBP5	1.09737169112262e-24	0.940091287357438	3.02512454091774e-20
ICM	TANC2	2.65131260818919e-34	0.936603633496794	7.30887346699514e-30
ICM	NREP	2.1764212543366e-21	0.936020795677122	5.99974047182972e-17
ICM	ITGA1	2.24958987925807e-26	0.92111385406339	6.20144442015073e-22
ICM	AEBP1	2.39659348489148e-22	0.916135177082495	6.60668925980035e-18
ICM	NRP1	1.81947890123051e-27	0.916085658764326	5.01575748702215e-23
ICM	NMD3	1.42130859778921e-24	0.915628209161125	3.91812141152551e-20
ICM	SHROOM3	3.96803814908869e-25	0.910175857174532	1.09386907655928e-20
ICM	FLRT2	1.98545502298904e-21	0.908652024995397	5.4733038618739e-17
ICM	EDA	6.47919794336735e-17	0.901438941193844	1.78612049704808e-12
ICM	KIAA1755	1.09841235351655e-24	0.891981782526065	3.02799333493907e-20
ICM	NBEA	6.83441813482662e-28	0.887704108298245	1.88404404722765e-23
ICM	KCNN3	3.30413049586428e-23	0.886658926008552	9.10849653794907e-19
ICM	DMD	4.89483562335171e-20	0.885358521210052	1.34935933628936e-15
ICM	MYO1E	3.27533359129194e-20	0.882962302351045	9.02911211111448e-16
ICM	AL139383.1	2.05140823460421e-19	0.877609554038736	5.65511708033342e-15
ICM	AGMO	1.9395152038003e-21	0.875632577834886	5.34666156231628e-17
ICM	KCNMB2	1.459671264544e-15	0.872655480777174	4.02387577496844e-11
ICM	GPC6	8.09372590354533e-28	0.866864576229212	2.23119741983034e-23
ICM	RAD51B	5.34280124218446e-25	0.8643524868583	1.47285001843299e-20
ICM	TSC22D1	6.5351449924907e-19	0.861707785744959	1.80154342007991e-14
ICM	MID1	8.05995890209881e-24	0.859609242494434	2.22188887054158e-19
ICM	PLAGL1	3.39014525001089e-27	0.851783029822743	9.34561341070502e-23
ICM	AC104041.1	1.36074821266324e-14	0.851248087735678	3.75117459784876e-10
ICM	PAM	2.40987978279819e-27	0.849232268345427	6.64331559723976e-23
ICM	LINC00377	5.03867366626457e-18	0.847828480774603	1.38901116957915e-13
ICM	COL24A1	8.00869941129519e-27	0.844248544333718	2.20775816671175e-22
ICM	SIPA1L1	7.71866505116638e-17	0.839604715319444	2.12780439465504e-12
ICM	DIO2	2.02051196807026e-21	0.830582384480759	5.5699453423793e-17
ICM	SESN3	4.53313853796099e-18	0.82703728655593	1.24965030075971e-13
ICM	ITGA9	1.18646472076134e-22	0.826725462511862	3.27072729572278e-18
ICM	MMP16	5.04204677651578e-20	0.823603052722828	1.38994103488211e-15
ICM	MGAT5	6.46246895720215e-18	0.822821426718241	1.78150881743192e-13
ICM	ITIH5	2.20219798246078e-17	0.821584358007128	6.07079917824962e-13
ICM	ADAMTS12	8.0542338276621e-18	0.818398979472079	2.22031063927161e-13
ICM	HMCN1	1.39336133729357e-18	0.810730336013079	3.84107919851719e-14
ICM	DLC1	6.47293040148591e-53	0.804608814008235	1.78439272377762e-48
ICM	CRIM1	2.17729786426104e-18	0.795269382365852	6.00215702240842e-14
ICM	CSRNP3	6.66467518418789e-18	0.794517812930072	1.83725100802508e-13
ICM	ANKRD10	2.14635032074881e-22	0.7933500310626	5.91684392920823e-18
ICM	PTN	5.94807337394996e-19	0.792358033111698	1.63970538699679e-14
ICM	PDE7B	9.99807307611865e-27	0.788228744976574	2.75616880489363e-22
ICM	ECM2	9.14826578038804e-20	0.787004284744353	2.52190242767957e-15
ICM	MXRA5	1.42833657715178e-16	0.78373247886313	3.9374954422343e-12
ICM	OSBPL10	7.92360182687722e-18	0.783164726812683	2.18429931561524e-13
ICM	CMKLR1	2.50417094719362e-16	0.782903448716683	6.90324805012865e-12
ICM	TSHZ2	1.40635079672271e-45	0.777393486050133	3.87688724132549e-41
ICM	ANTXR1	2.27537710128233e-21	0.776987464045068	6.272532055105e-17
ICM	AHNAK	1.73373111622042e-18	0.770179118983189	4.77937656808482e-14
ICM	COL12A1	4.2457656171849e-27	0.764010248870313	1.17043020768936e-22
ICM	ME3	2.13051423825699e-18	0.761759834096834	5.87318860060304e-14
ICM	PLEKHA2	1.3057484000552e-20	0.759423314488828	3.59955661443217e-16
ICM	SOX6	5.216027847757e-22	0.758078762865055	1.43790239679117e-17
ICM	ADAMTS9-AS2	3.45053780466389e-26	0.756551164147855	9.51209756611693e-22
ICM	FHL1	2.09423366944848e-21	0.751395714385854	5.77317395656864e-17
ICM	DGKB	3.30382798191508e-13	0.747601928971232	9.1076625977453e-09
ICM	RGL1	2.88264796909097e-16	0.743415537602596	7.94659565639308e-12
ICM	ZBTB46	2.10053235414133e-16	0.741168050538319	5.79053754066141e-12
ICM	GPI	1.73598134576936e-13	0.740211225751583	4.7855797758824e-09
ICM	SEMA3C	1.50561004621096e-12	0.73852028644143	4.15051521438975e-08
ICM	ABCA10	9.97372375012095e-32	0.731608754774694	2.74945642619584e-27
ICM	C11orf58	2.49588443520882e-17	0.730765348241981	6.88040462254014e-13
ICM	ENC1	2.47804028214782e-15	0.730548911110171	6.83121364579689e-11
ICM	SEPTIN11	2.81301200018102e-20	0.724060845322065	7.75463018089903e-16
ICM	MATN2	3.28752997798985e-19	0.722955719486387	9.06273389032462e-15
ICM	KCNMB2-AS1	2.97237418700645e-12	0.721684205462274	8.19394392132067e-08
ICM	AC098829.1	9.61637321773977e-14	0.717727089024658	2.65094560493432e-09
ICM	PRKCE	4.15667562240487e-21	0.715876013464251	1.14587076882835e-16
ICM	RIN2	2.22904197700959e-23	0.713016388458595	6.14480001802234e-19
ICM	ZNF704	1.18011360458126e-25	0.711815820758981	3.25321917374917e-21
ICM	PKP4	9.58173233147398e-14	0.707273179831532	2.64139615181743e-09
ICM	RHOBTB1	6.70812109266754e-15	0.707249222206412	1.84922774161566e-10
ICM	AC113383.1	4.29216440190996e-15	0.705885256599015	1.18322096067452e-10
ICM	KIAA1217	8.14383276430753e-17	0.704659135122758	2.24501037813666e-12
ICM	TTC3	2.52379726316659e-22	0.696796827389682	6.95735191537134e-18
ICM	ZNF106	6.21421950846602e-17	0.695879900543324	1.71307389189883e-12
ICM	ASPN	8.10056241301759e-15	0.694414038423832	2.23308204039656e-10
ICM	MIR100HG	3.4792007274501e-29	0.68974446490355	9.5911126453617e-25
ICM	KALRN	1.66213006013144e-10	0.688780587364866	4.58199393676435e-06
ICM	GLS	9.03637121405016e-22	0.681016879379118	2.49105645257721e-17
ICM	AP001528.1	3.49504895088218e-17	0.680884092443443	9.63480144289691e-13
ICM	NHS	6.98710822488937e-14	0.680269482883526	1.92613612435525e-09
ICM	PLXDC1	3.35625530488329e-16	0.673761664117405	9.25218899897176e-12
ICM	ADGRA3	2.02594695930225e-16	0.672341138057553	5.58492798270852e-12
ICM	EBF2	5.94041148540627e-28	0.670871707618887	1.63759323418195e-23
ICM	ATXN1	1.78662596365739e-17	0.66234453273257	4.92519179401433e-13
ICM	SLCO3A1	7.48939599666128e-14	0.659028881853874	2.06460179439962e-09
ICM	POGZ	2.73164717439278e-17	0.655055027249198	7.53033176564858e-13
ICM	CACNA1C	2.06106768037533e-07	0.650734880952403	0.00568174527449069
ICM	KLHL13	2.50073056479705e-13	0.650455736366564	6.89376394797602e-09
ICM	TEX41	2.44968673502136e-17	0.650036184400977	6.75305142243339e-13
ICM	DIP2C	3.26818941148667e-16	0.640162067210203	9.00941775064531e-12
ICM	EVL	2.10651385556946e-13	0.639688617491067	5.80702674564834e-09
ICM	TTC7B	4.96615632114678e-13	0.63867783421964	1.36902031305053e-08
ICM	PTPN13	3.46711493650265e-16	0.635956914645897	9.55779574545684e-12
ICM	PSD3	1.70708138973909e-19	0.635848752354884	4.70591126709374e-15
ICM	ADAM19	1.43506396520093e-12	0.633336371098152	3.9560408328694e-08
ICM	FAT4	2.89632921998333e-12	0.632323902151946	7.98431076072804e-08
ICM	C1QTNF7	8.33431403827631e-15	0.629759281680707	2.29752035093163e-10
ICM	CEP112	4.81618968710229e-16	0.628487585588051	1.32767901104349e-11
ICM	GSE1	2.00231834383242e-11	0.628435603412666	5.51979097844284e-07
ICM	CENPP	1.29799939039518e-17	0.627876528662108	3.57819491950239e-13
ICM	TNS3	3.4136838857561e-14	0.624180388787077	9.41050236786383e-10
ICM	NHSL2	2.81275052588909e-11	0.623807864698898	7.75390937471845e-07
ICM	CCDC18-AS1	1.82970073294534e-14	0.62229676303709	5.04393601051043e-10
ICM	HHAT	3.68214428861896e-12	0.620738331924571	1.01505671604359e-07
ICM	LINC00968	2.43646002080354e-12	0.610063159583158	6.71658933934912e-08
ICM	SPRY4-AS1	1.11866054387137e-09	0.609829534447913	3.08381152129021e-05
ICM	DOCK7	1.03298025104485e-09	0.60934924269157	2.84761665805533e-05
ICM	LRCH1	3.01280068794916e-11	0.607901212832513	8.30538765646944e-07
ICM	CGNL1	2.51485255987659e-14	0.607777335249394	6.9326940518118e-10
ICM	PLEKHA1	3.4955030851568e-11	0.607763294285738	9.63605335485174e-07
ICM	TPK1	1.96258204317054e-12	0.60695330429481	5.41024991840823e-08
ICM	LSP1	1.78436779295431e-09	0.603273485536288	4.91896669483714e-05
ICM	FARP1	1.36655106925055e-14	0.602303925228488	3.767171332603e-10
ICM	PTPRE	2.63777301618164e-11	0.59528616292203	7.27154887370792e-07
ICM	PHACTR2	1.15983758828913e-12	0.594134691878755	3.19732427963664e-08
ICM	PRICKLE1	1.30978226259759e-18	0.593690996973151	3.61067676330279e-14
ICM	RUNX2	3.10064917071742e-14	0.592125376738071	8.54755956891672e-10
ICM	GUCY1A2	1.63496360926902e-11	0.590232710697161	4.5071041816719e-07
ICM	ANKRD6	3.11495486231547e-11	0.588180171221825	8.58699606894505e-07
ICM	ADGRL2	3.94659141226972e-12	0.587464553286542	1.08795685462039e-07
ICM	MOXD1	5.74937865452161e-11	0.585597042291458	1.58493121369197e-06
ICM	NEO1	4.43073405782779e-11	0.584303968656122	1.22142045772139e-06
ICM	C11orf80	1.32367158267303e-11	0.5822900792967	3.64896545195473e-07
ICM	PREX2	6.72746931672716e-12	0.575571565973612	1.85456146654218e-07
ICM	ANKRD36C	1.67651449336769e-12	0.574449202586824	4.62164750386672e-08
ICM	SPIN1	2.9182889146726e-10	0.573800823682087	8.04484705107797e-06
ICM	PLS3	2.3524814700783e-11	0.573728703701389	6.48508566856484e-07
ICM	HIBCH	2.03290536041666e-12	0.572243489494525	5.60411020706061e-08
ICM	WSB1	2.49843420872824e-19	0.569435394870999	6.88743358320114e-15
ICM	FNBP1	1.04996451513413e-11	0.569309043820738	2.89443717887027e-07
ICM	DYNC2LI1	3.31724752782282e-11	0.568915688599053	9.14465625994916e-07
ICM	WDR60	1.51541006631497e-11	0.568667842256156	4.17753092981048e-07
ICM	KLF12	2.12763813741984e-21	0.568277999029455	5.86526005342527e-17
ICM	AC007389.1	1.36220290196099e-11	0.568064779896804	3.75518473983585e-07
ICM	STAU2	5.47828043859505e-13	0.564533403023999	1.5101975685075e-08
ICM	PLXDC2	3.06610727623158e-42	0.562574562404802	8.4523379283876e-38
ICM	PBX1	2.06109387430503e-20	0.561694346466093	5.68181748329668e-16
ICM	NAB1	3.30989704172588e-11	0.56121241151625	9.12439317492572e-07
ICM	FIGN	3.05327895240996e-15	0.559160704640207	8.41697408810854e-11
ICM	NSD2	3.51403630998694e-11	0.559127020218347	9.68714389574099e-07
ICM	COLGALT2	5.0867712182229e-09	0.555648952977142	0.000140227022172751
ICM	CD47	6.53538210028845e-12	0.553800097830514	1.80160878358652e-07
ICM	ITGB8	1.19921800749885e-10	0.553076876537562	3.30588428127207e-06
ICM	PARD3B	1.11855314784909e-20	0.55297488056655	3.08351546267557e-16
ICM	TCF4	5.80373677327637e-27	0.552546065673683	1.5999161162891e-22
ICM	GHR	1.19153991366784e-13	0.55111393131981	3.28471808000813e-09
ICM	MAP3K1	4.11906490987124e-09	0.549483875433949	0.000113550262370421
ICM	ZC3H12B	1.93956834451573e-08	0.548341911421964	0.000534680805532651
ICM	ZNF385D	9.27624724552896e-11	0.547522856914247	2.55718307817497e-06
ICM	PLCE1	6.15906415809698e-11	0.546961550239443	1.6978692164626e-06
ICM	CASK	6.00897874162581e-14	0.545919837916661	1.65649516970399e-09
ICM	C2orf27A	1.32507317167412e-08	0.544807712948276	0.000365282921235404
ICM	NAALADL2	2.12509450692071e-25	0.544760174783878	5.85824802722832e-21
ICM	COL16A1	5.79418742722736e-11	0.540579106335394	1.59728364806377e-06
ICM	AP001347.1	6.43295106241027e-10	0.538982423510789	1.77337161937464e-05
ICM	BACH2	1.05684325967304e-11	0.537092311814075	2.91339981394067e-07
ICM	EXT1	3.73252119351199e-22	0.534282915447019	1.02894411741545e-17
ICM	FAM20A	1.96889575054117e-10	0.533924753164307	5.42765491551683e-06
ICM	LTBP4	8.68777984688785e-12	0.533437723356901	2.39496027039157e-07
ICM	PTPRT	3.0602306886844e-09	0.53304727232838	8.43613793949628e-05
ICM	LDB2	6.57658524094312e-09	0.532740665182307	0.000181296725337079
ICM	LINC00342	1.69539196770137e-09	0.530820996979208	4.67368703736237e-05
ICM	THSD7A	6.97427771552013e-10	0.530119739400394	1.92259913783744e-05
ICM	KIAA1109	3.32100388793831e-13	0.529821773429606	9.15501141787954e-09
ICM	MPDZ	1.37293754809845e-11	0.528073426820403	3.784776938843e-07
ICM	SENP7	6.93485364705395e-09	0.524483881468097	0.000191173110488336
ICM	KLHDC1	3.0245161221335e-10	0.524119720098335	8.33768359388541e-06
ICM	DOCK6	2.89574437869543e-09	0.522420082849094	7.98269852874969e-05
ICM	CPQ	1.13831975732574e-15	0.521335438077682	3.13800607501986e-11
ICM	SERINC5	1.73942415192154e-11	0.521181156832064	4.79507055960212e-07
ICM	MEIS1	7.75909396852532e-08	0.521052626914069	0.00213894943430337
ICM	TVP23C	1.60980393396366e-10	0.520193340447894	4.43774650475761e-06
ICM	SCAPER	6.61795292587391e-10	0.518653410399925	1.82437108307566e-05
ICM	LMO4	1.96983544447652e-07	0.516628787146062	0.00543024536978843
ICM	RANBP17	4.40087498530442e-10	0.51367183870232	1.21318920719887e-05
ICM	PLA2R1	1.1511554733505e-08	0.512388792528106	0.000317339029338531
ICM	DDAH1	5.39887734881539e-11	0.511985954778123	1.48830851874794e-06
ICM	HS2ST1	5.13640199004682e-09	0.510413906196669	0.000141595193659621
ICM	ANOS1	2.55947832596358e-08	0.510306358605104	0.000705571390118379
ICM	NEK11	9.98898630866661e-09	0.508424383161381	0.000275366385571012
ICM	DOK5	2.51632684191868e-09	0.507893418265095	6.93675820511724e-05
ICM	AFF3	7.88930784540107e-16	0.5015462754668	2.17484549374171e-11
ICM	AF117829.1	3.71478475023405e-11	0.50120517936978	1.02405471209702e-06
ICM	LRBA	2.18500784115238e-10	0.500896554109067	6.02341111570476e-06
ICM	XAF1	1.08031682255812e-09	0.499907458089022	2.97810938474598e-05
ICM	EEA1	8.02021925553746e-09	0.49972736614713	0.000221093384217401
ICM	ZNF532	9.70638944955295e-09	0.498860664256185	0.000267576037955826
ICM	CSAD	1.01822356268632e-11	0.496335557307711	2.80693689525737e-07
ICM	PDLIM3	3.2239625690519e-13	0.494184036612854	8.88749761410538e-09
ICM	OGN	8.66484112888053e-07	0.493667984359938	0.023886367539985
ICM	TERF2IP	3.82378360332009e-10	0.491619511763185	1.05410242592725e-05
ICM	WDR27	7.72808600922992e-08	0.4913875919253	0.00213040147016441
ICM	CIRBP	6.84891789888803e-10	0.489680671495982	1.88804119718646e-05
ICM	DOK6	6.18125404918e-09	0.489221486087744	0.000170398630373745
ICM	BTBD9	2.30456317668007e-12	0.4872940788432	6.35298930915394e-08
ICM	ACSL3	9.02708761971191e-09	0.482989747097089	0.000248849724412598
ICM	KIAA1324L	1.00411648615216e-06	0.481701022011456	0.0276804791737565
ICM	GUCY1A1	1.14088101556228e-10	0.479916348705378	3.14506669560053e-06
ICM	HERC1	1.32247970433657e-12	0.478938320033852	3.64567980094462e-08
ICM	RNF115	4.31368452766652e-09	0.478607470350222	0.000118915341374183
ICM	MAGI2	7.71692503229998e-16	0.476666418232335	2.12732472365414e-11
ICM	GLCE	8.50980452443958e-07	0.475096054973568	0.0234589781325226
ICM	BICD1	7.53718522871957e-13	0.474022827270358	2.07777585200112e-08
ICM	GMDS-DT	9.03690985031791e-12	0.4732163016449	2.49120493843714e-07
ICM	MYO1D	2.12142029326008e-15	0.471813795925025	5.84811932243006e-11
ICM	MEG3	2.81093911669184e-12	0.471556947825924	7.74891586298441e-08
ICM	MBP	1.96492849760333e-07	0.470983698249241	0.0054167183893431
ICM	DST	1.17480024231185e-15	0.468737454221523	3.23857182798108e-11
ICM	DLG2	8.35236685628649e-15	0.466790767848976	2.3024969712725e-10
ICM	NR3C1	3.11183315642895e-11	0.463840299162532	8.57839046232769e-07
ICM	RAI14	1.4897148931236e-07	0.463198530792903	0.00410669704587383
ICM	POLA1	2.71422255992866e-07	0.45970281485667	0.00748229733095535
ICM	MIR99AHG	2.00702101702125e-19	0.458960076284497	5.53275483762247e-15
ICM	RBM25	1.40171485257919e-09	0.458412138030836	3.86410733410506e-05
ICM	ZEB1-AS1	7.03624637564934e-08	0.457945154434713	0.00193968203837525
ICM	ZNF280D	2.3106016125342e-11	0.455697505890281	6.36963546527303e-07
ICM	SLAIN2	9.25886501279253e-07	0.454956262604337	0.0255239131807652
ICM	FGD5	5.03045120176675e-07	0.453702889741051	0.0138674448279104
ICM	RHOT1	7.36029096440657e-08	0.452744854934731	0.00202901141015796
ICM	DAB1	5.20005228401644e-08	0.449166083557453	0.00143349841313481
ICM	GARS-DT	4.5785110825368e-08	0.447693755971261	0.00126215815012292
ICM	FOXP1	4.01571744698924e-15	0.445977501010457	1.10701282861152e-10
ICM	NUBPL	4.65874176273583e-07	0.445969012795037	0.0128427534173338
ICM	PDGFD	4.71799701753152e-13	0.442569408168886	1.30061023782292e-08
ICM	PRMT2	3.44884344554523e-07	0.441063250063325	0.00950742672633454
ICM	ZC3H6	3.46674127688958e-07	0.440781228895637	0.0095567656780015
ICM	ANKAR	3.40996406044332e-07	0.440176315183384	0.0094002479254241
ICM	LINC01473	4.83265245862434e-10	0.43992017764916	1.33221730326897e-05
ICM	GATA6	3.04601586257899e-07	0.439900917567239	0.0083969519283715
ICM	ACTN4	3.96236748746177e-07	0.438192783191027	0.0109230584526859
ICM	ARHGAP22	1.18610707305755e-06	0.436160449138213	0.0326974136829776
ICM	RUNX1	1.17422902859766e-09	0.435489254905042	3.23699716313517e-05
ICM	NCK2	1.73269591806149e-08	0.434176532424405	0.000477652283732012
ICM	MAPK10	1.04275987812957e-08	0.434085795467131	0.000287457615603978
ICM	C2CD5	1.65901608624135e-07	0.432064058398712	0.00457340964494153
ICM	ATRX	2.55510107019387e-09	0.430589238048416	7.04364712020345e-05
ICM	SH3YL1	1.16140762491641e-06	0.428257534881209	0.0320165239960707
ICM	ECHDC2	1.56131086505844e-09	0.4280346698405	4.3040656617066e-05
ICM	ZNF438	2.44036324304421e-07	0.427279318819706	0.00672734935209998
ICM	MYH10	4.20099434138331e-08	0.424766042679594	0.00115808811008914
ICM	RNF130	2.50292323248397e-08	0.423965414365352	0.000689980847498856
ICM	PODN	1.28147561961264e-08	0.423062744629641	0.000353264384058617
ICM	CCDC171	1.78973476013744e-07	0.42254509794311	0.00493376181327087
ICM	MACF1	5.49038885738812e-13	0.421776686834815	1.51353549631618e-08
ICM	ARGLU1	3.74260900253554e-09	0.420791284894467	0.000103172502372897
ICM	COG6	3.67030933633528e-07	0.4205118810406	0.0101179417474755
ICM	SPRED2	1.21660396364401e-07	0.418781996595338	0.00335381214657744
ICM	MAP4K3-DT	1.05290756651719e-07	0.418695091863279	0.00290255028861795
ICM	CDRT4	1.21190781589581e-06	0.418401199887064	0.0334086627607998
ICM	DMTF1	1.93156753298267e-07	0.41791002765677	0.00532475221817333
ICM	AOPEP	4.05958275070635e-11	0.416360647443732	1.11910517688722e-06
ICM	SF3B1	6.53636312698153e-08	0.41631411337076	0.001801879223215
ICM	TPT1-AS1	2.09324096300205e-07	0.415183344102799	0.00577043736270776
ICM	ENAH	9.66869286332282e-07	0.415060643801022	0.026653685616322
ICM	NKTR	4.5171055830555e-08	0.414396567658695	0.00124523049608091
ICM	PSPC1	1.65244485878562e-07	0.413291063278877	0.00455529474221432
ICM	BBS9	6.44285152433164e-08	0.411807732379868	0.0017761008797125
ICM	RASA2	3.44814608163953e-07	0.410464981650231	0.0095055043032557
ICM	QSER1	1.4606203751871e-06	0.410034273563899	0.0402649218827829
ICM	NEK1	1.56614896462135e-06	0.407986531143042	0.0431740285077167
ICM	NHSL1	1.31893918517407e-07	0.407136814814739	0.00363591965176937
ICM	GOLIM4	8.20628036195676e-07	0.404474600535343	0.0226222530738062
ICM	ETV6	4.59486381944807e-07	0.403379077918498	0.0126666610910725
ICM	DLEU2	1.24820820936257e-06	0.403029781393611	0.0344093557074979
ICM	CCDC7	4.86394652544541e-07	0.402783949972304	0.0134084413866954
ICM	ESYT2	2.76714756456499e-08	0.395874229399936	0.000762819569123632
ICM	ST5	1.91588399533881e-07	0.39498336626945	0.00528151740995049
ICM	BPTF	9.85736671516372e-09	0.391787980725518	0.000271738028236918
ICM	SLIT2	1.38681281579502e-09	0.391523116766192	3.82302688930214e-05
ICM	SLF2	1.40576801934602e-06	0.388851922896994	0.0387528069893117
ICM	NFIA-AS2	9.0681664151495e-07	0.382577986939598	0.0249982143566426
ICM	CYTH3	5.25258436037345e-09	0.380402502000263	0.000144797993062415
ICM	EPB41L2	3.32030063964419e-08	0.379466052564025	0.000915307277330715
ICM	CFH	1.60748892555047e-09	0.378621291680931	4.43136472106499e-05
ICM	ZNF521	2.19519709459726e-08	0.37667893513458	0.000605149983067627
ICM	ARHGAP21	3.49233672938232e-08	0.376671112326559	0.000962732466188824
ICM	TENM4	6.8940330015309e-07	0.373844212630039	0.0190047807753202
ICM	TMEM14B	1.36307571647986e-06	0.373654854722164	0.0375759082762003
ICM	DPYSL3	1.5796740784327e-06	0.369787994779665	0.0435468753201543
ICM	RNF152	1.13411025841506e-06	0.369373661702348	0.0312640174937279
ICM	PNISR	5.24615965042794e-11	0.368431575128654	1.44620883083347e-06
ICM	FSD1L	1.04163363485607e-06	0.367918352535809	0.0287147144120772
ICM	AGAP1	1.51903900982589e-08	0.363629396617387	0.000418753483838702
ICM	SPTBN1	2.34998710281175e-12	0.359298577977019	6.47820944632115e-08
ICM	KCNT2	1.58119477349222e-07	0.358675288088264	0.00435887963208602
ICM	PHIP	4.08699636653309e-07	0.357930481867736	0.0112666228836218
ICM	LINC00174	1.69350000328748e-06	0.3568670911382	0.046684714590626
ICM	ZFPM2	4.07061332019204e-09	0.349769492403495	0.000112214597397734
ICM	LHFPL6	5.43823585626293e-12	0.34966973816558	1.499158478496e-07
ICM	PCM1	6.88393449847296e-08	0.347992207644438	0.00189769422319404
ICM	JAK1	9.44227255633085e-11	0.344727712840997	2.60295127560373e-06
ICM	LAMB1	6.54214286595979e-09	0.338915335186392	0.000180347252385914
ICM	TRPS1	1.01934636929311e-08	0.337731996801455	0.000281003213623032
ICM	ACYP2	8.9322837677758e-07	0.330477760460287	0.0246236266626275
ICM	BICC1	2.07626481713144e-13	0.330318347507196	5.72363922138623e-09
ICM	TRIO	4.00377881328776e-07	0.326540422344296	0.0110372170545904
ICM	ABI3BP	2.59543134109319e-12	0.321459737778677	7.15482557799159e-08
ICM	JMJD1C	4.27020666449391e-08	0.313280728612174	0.00117716787120104
ICM	DOCK1	1.39119338801069e-07	0.312347197390054	0.00383510281272906
ICM	VPS13C	2.97284441470404e-07	0.311282214141016	0.00819524019801463
ICM	CALD1	4.4371415668669e-10	0.305720305958306	1.2231868157382e-05
ICM	NBEAL1	4.28851820536583e-07	0.29779395266892	0.011822158136732
ICM	DPYD	1.31918181570636e-08	0.293325169415756	0.000363658851135773
ICM	AUTS2	2.59283261357202e-08	0.273624108502186	0.0007147661665834
ICM	PARD3	1.53596349866668e-07	0.272493519392399	0.00423419057677443
ICM	ZEB1	7.37656765404359e-09	0.261590110033819	0.00020334984051902

## Sheet: Supplementary Table 2
Supplementary Table 2.The enriched Function results of differentially expressed genes between the ICM and control groups
Cluster	Description	pvalue	p.adjust	qvalue	geneID	Counts
Normal	cell-substrate adhesion	9.24575e-14	3.37008e-10	2.93139e-10	APOD/AXL/BCL2/BCL6/CALR/CARMIL1/CCN1/CCN2/CD63/COL5A3/CORO2B/DOCK5/EMILIN1/EMP2/FBLN2/FBLN5/FN1/ITGA5/ITGAV/KANK1/LAMC1/MKLN1/NID1/NID2/P4HB/PHLDB2/PTPRK/SERPINE1/SNED1/SPOCK1/VIT	31
Normal	extracellular matrix organization	5.85054e-10	5.69193e-07	4.95101e-07	ADAMTS2/ADAMTS5/CCN1/CCN2/COL4A1/COL4A2/COL4A4/COL5A3/CST3/DDR2/DPT/ELN/EMILIN1/FBLN2/FBLN5/LAMA2/LAMC1/MMP19/MMP2/NID1/NID2/PDGFRA/PHLDB2/VIT	24
Normal	extracellular structure organization	6.2339e-10	5.69193e-07	4.95101e-07	ADAMTS2/ADAMTS5/CCN1/CCN2/COL4A1/COL4A2/COL4A4/COL5A3/CST3/DDR2/DPT/ELN/EMILIN1/FBLN2/FBLN5/LAMA2/LAMC1/MMP19/MMP2/NID1/NID2/PDGFRA/PHLDB2/VIT	24
Normal	external encapsulating structure organization	7.07224e-10	5.69193e-07	4.95101e-07	ADAMTS2/ADAMTS5/CCN1/CCN2/COL4A1/COL4A2/COL4A4/COL5A3/CST3/DDR2/DPT/ELN/EMILIN1/FBLN2/FBLN5/LAMA2/LAMC1/MMP19/MMP2/NID1/NID2/PDGFRA/PHLDB2/VIT	24
Normal	regulation of cell-substrate adhesion	7.80787e-10	5.69193e-07	4.95101e-07	APOD/BCL2/BCL6/CALR/CARMIL1/CCN1/CORO2B/DOCK5/EMILIN1/EMP2/FBLN2/FN1/ITGA5/KANK1/NID1/P4HB/PHLDB2/SERPINE1/SPOCK1/VIT	20
Normal	cell-matrix adhesion	2.63562e-09	1.60114e-06	1.39272e-06	APOD/BCL2/BCL6/CCN2/CD63/COL5A3/CORO2B/EMILIN1/EMP2/FBLN5/FN1/ITGA5/ITGAV/MKLN1/NID1/NID2/PHLDB2/PTPRK/SERPINE1/SNED1	20
Normal	protein folding in endoplasmic reticulum	4.89436e-07	0.000254856	0.000221681	CALR/CANX/HSP90B1/HSPA5/P4HB	5
Normal	positive regulation of cell-substrate adhesion	1.03223e-06	0.00044891	0.000390475	CALR/CARMIL1/CCN1/DOCK5/EMILIN1/EMP2/FBLN2/FN1/ITGA5/NID1/P4HB/VIT	12
Normal	regulation of integrin-mediated signaling pathway	1.10842e-06	0.00044891	0.000390475	CD63/EMP2/LAMA2/LAMC1/NID1/TIMP1	6
Normal	positive regulation of integrin-mediated signaling pathway	1.32708e-06	0.000483721	0.000420755	CD63/EMP2/LAMA2/LAMC1/NID1	5
Normal	aging	4.49567e-06	0.0014897	0.00129579	APOD/CANX/CCN2/COL4A2/CTSC/EDNRB/IGF1R/MMP2/PDGFRB/SERPINF1/SERPING1/TGFBR2/TIMP1	13
ICM	extracellular matrix organization	1.9557e-10	2.62589e-07	2.40677e-07	ABI3BP/ADAMTS12/AEBP1/ANTXR1/COL12A1/COL14A1/COL16A1/COL24A1/COL4A5/COLGALT2/ECM2/EXT1/FAP/FLRT2/HMCN1/LAMB1/LUM/MATN2/MMP16/MYO1E/POSTN/RUNX1/SMOC2/SULF1/TLL2	25
ICM	extracellular structure organization	2.09e-10	2.62589e-07	2.40677e-07	ABI3BP/ADAMTS12/AEBP1/ANTXR1/COL12A1/COL14A1/COL16A1/COL24A1/COL4A5/COLGALT2/ECM2/EXT1/FAP/FLRT2/HMCN1/LAMB1/LUM/MATN2/MMP16/MYO1E/POSTN/RUNX1/SMOC2/SULF1/TLL2	25
ICM	external encapsulating structure organization	2.38501e-10	2.62589e-07	2.40677e-07	ABI3BP/ADAMTS12/AEBP1/ANTXR1/COL12A1/COL14A1/COL16A1/COL24A1/COL4A5/COLGALT2/ECM2/EXT1/FAP/FLRT2/HMCN1/LAMB1/LUM/MATN2/MMP16/MYO1E/POSTN/RUNX1/SMOC2/SULF1/TLL2	25
ICM	cell-substrate adhesion	1.9307e-08	1.59428e-05	1.46124e-05	ABI3BP/ACTN4/ADAMTS12/ANTXR1/CASK/COL16A1/DLC1/DOCK1/ECM2/EDA/EDIL3/EPHA3/FREM1/ITGA1/ITGA9/ITGB8/ITGBL1/LAMB1/LIMCH1/MACF1/NRP1/PLEKHA2/PRKCE/RIN2	24
ICM	cell-matrix adhesion	6.52809e-07	0.000431246	0.000395259	ADAMTS12/CASK/COL16A1/DLC1/ECM2/EDA/EPHA3/FREM1/ITGA1/ITGA9/ITGB8/ITGBL1/LIMCH1/MACF1/NRP1/PLEKHA2/RIN2	17
ICM	regulation of cell-substrate adhesion	5.89836e-06	0.0021647	0.00198406	ABI3BP/ACTN4/CASK/COL16A1/DLC1/DOCK1/ECM2/EDIL3/EPHA3/LIMCH1/MACF1/NRP1/PLEKHA2/PRKCE/RIN2	15
ICM	collagen fibril organization	1.17311e-05	0.00328601	0.0030118	ADAMTS12/AEBP1/COL12A1/COL14A1/COLGALT2/EXT1/LUM/TLL2	8
ICM	regulation of actin filament-based process	6.57992e-05	0.0137022	0.0125588	ANK2/CACNA1C/CD47/CGNL1/DLC1/EPHA3/EVL/LIMCH1/NCK2/NRP1/PAM/PLEKHH2/PRKCE/PRKN/RHOBTB1/SLIT2/SPTBN1/STAU2/SVIL	19
ICM	regulation of cell-matrix adhesion	0.000273413	0.0392645	0.0359879	CASK/COL16A1/DLC1/EPHA3/LIMCH1/MACF1/NRP1/PLEKHA2/RIN2	9
ICM	regulation of supramolecular fiber organization	0.000304223	0.0418686	0.0383747	AEBP1/CD47/CGNL1/DLC1/EVL/LIMCH1/MID1/NAV3/NCK2/NRP1/PLEKHH2/PRKCE/PRKN/SLAIN2/SLIT2/SPTBN1/SVIL	17

## Sheet: Supplementary Table 3
Supplementary Table 3.The enriched Function results of Up-regulated genes between the ICM and control groups from transcriptome data (GSE116250)
Class	Description	LogP	Log(q-value)	Symbols	Gene counts
ICM	extracellular matrix organization	-11.6236	-10.3225	COL12A1,COL16A1,ECM2,EXT1,LUM,MATN2,MMP16,TLL2,COL14A1,LTBP4,COLGALT2,SULF1,SMOC2	13
ICM	extracellular structure organization	-10.604	-9.60403	COL12A1,COL16A1,ECM2,EXT1,LUM,MATN2,MMP16,TLL2,COL14A1,LTBP4,COLGALT2,SULF1,SMOC2	13
ICM	external encapsulating structure organization	-9.58456	-8.76065	COL12A1,COL16A1,ECM2,EXT1,LUM,MATN2,MMP16,TLL2,COL14A1,LTBP4,COLGALT2,SULF1,SMOC2	13
ICM	Extracellular matrix organization	-9.33376	-8.63479	COL12A1,COL16A1,ITGB8,LUM,MMP16,TLL2,COL14A1,LTBP4,ADAM19,COLGALT2,ASPN,COL21A1	12
ICM	collagen fibril organization	-7.46225	-6.86019	COL12A1,EXT1,LUM,TLL2,COL14A1,COLGALT2	6
ICM	supramolecular fiber organization	-5.71324	-5.23706	COL12A1,DPYSL3,EXT1,LUM,MYO1D,TLL2,COL14A1,LTBP4,COLGALT2,ENAH,SHROOM3	11
ICM	NABA ECM GLYCOPROTEINS	-5.69299	-5.23706	AEBP1,ECM2,MATN2,THBS4,LTBP4,MXRA5,SMOC2	7
ICM	axon guidance	-5.25987	-4.86193	EDNRA,EPHA3,EXT1,MATN2,ENAH,KIAA1755,BOC	7
ICM	cell adhesion mediated by integrin	-5.12568	-4.77889	COL16A1,EXT1,ITGB8,ITGBL1	4
ICM	enzyme-linked receptor protein signaling pathway	-4.74702	-4.44599	EPHA3,EXT1,ITGB8,PTN,LTBP4,PTPRT,SULF1,PLCE1,DOK5,PDGFD	10
ICM	skeletal system development	-4.6625	-4.40287	RUNX1,CMKLR1,EDNRA,EXT1,ITGB8,MMP16,OGN,SULF1,FREM1	9
ICM	regulation of extracellular matrix organization	-4.14519	-3.92334	AEBP1,RUNX1,FAP,ANTXR1	4
ICM	cell-substrate adhesion	-3.64408	-3.46588	ECM2,ITGB8,ITGBL1,ANTXR1,FREM1	5
ICM	cell-cell adhesion	-3.62078	-3.46588	EXT1,ITGB8,THBS4,COL14A1,ITGBL1,PTPRT,TENM4,BOC	8
ICM	Assembly of collagen fibrils and other multimeric structures	-3.27249	-3.14755	COL12A1,TLL2,COL14A1	3
ICM	cell-matrix adhesion	-3.12043	-3.02352	ECM2,ITGB8,ITGBL1,FREM1	4
ICM	actin cytoskeleton organization	-2.91146	-2.84088	DPYSL3,MYO1D,AUTS2,PDLIM3,ENAH,SHROOM3,ANTXR1	7
ICM	heart development	-2.77048	-2.72472	EDNRA,EXT1,GATA6,COL14A1,TENM4,PDLIM3,BICC1	7
ICM	actin filament-based process	-2.6152	-2.59292	DPYSL3,MYO1D,AUTS2,PDLIM3,ENAH,SHROOM3,ANTXR1	7
ICM	actin filament organization	-2.01857	-2.01857	DPYSL3,MYO1D,ENAH,SHROOM3	4

## Sheet: Supplementary Table 4
Supplementary Table 4.The enriched Function results of Up-regulated proteins between the ICM and control groups from proteome data (IPX0005712000)
Class	Description	LogP	Log(q-value)	Symbols	counts
ICM	supramolecular fiber organization	-30.0306	-28.7296	ACTA1,ACTN1,ANG,RHOA,RHOC,CFL1,CNN3,COL6A1,CSRP1,CST3,DES,DIAPH1,DNM2,FUS,HSP90AB1,KPNB1,LTBP2,MAP4,MYO1D,NRAP,PAFAH1B1,PLS3,RAC1,FSCN1,SVIL,TLN1,TPM4,VASP,VIM,ZYX,LUZP1,TAGLN2,TCAP,IQGAP1,PDLIM1,TMSB10,ELMO1,ARPC2,BASP1,ARPC1A,SORBS1,LDB3,SWAP70,CLASP2,COBL,CORO1C,ANKRD1,PDXP,INF2,SYNPO2L,MYPN,XIRP1,LMOD2,CTTN,EPB41L1,PTPN1,ARHGEF17,PDLIM5,PDLIM3,PDLIM2,PDCL3	61
ICM	actin cytoskeleton organization	-29.3063	-28.3063	ACTA1,ACTN1,ANG,RHOA,RHOC,CFL1,CNN3,CSRP1,DIAPH1,DNM2,CTTN,EPB41L1,MYO1D,NRAP,PAFAH1B1,PLS3,PTPN1,RAC1,FSCN1,SVIL,TLN1,TPM4,VASP,ZYX,LUZP1,TAGLN2,TCAP,IQGAP1,PDLIM1,TMSB10,ARHGEF17,ELMO1,ARPC2,ARPC1A,SORBS1,PDLIM5,LDB3,SWAP70,COBL,CORO1C,ANKRD1,PDLIM3,PDXP,PDLIM2,INF2,PDCL3,SYNPO2L,MYPN,XIRP1,LMOD2	50
ICM	actin filament-based process	-26.8691	-26.0452	ACTA1,ACTN1,ANG,RHOA,RHOC,CFL1,CNN3,CSRP1,DIAPH1,DNM2,CTTN,EPB41L1,MYO1D,NRAP,PAFAH1B1,PLS3,PTPN1,RAC1,FSCN1,SVIL,TLN1,TPM4,VASP,ZYX,LUZP1,TAGLN2,TCAP,IQGAP1,PDLIM1,TMSB10,ARHGEF17,ELMO1,ARPC2,ARPC1A,SORBS1,PDLIM5,LDB3,SWAP70,COBL,CORO1C,ANKRD1,PDLIM3,PDXP,PDLIM2,INF2,PDCL3,SYNPO2L,MYPN,XIRP1,LMOD2	50
ICM	actin filament organization	-25.1604	-24.4614	ACTA1,ACTN1,ANG,RHOA,RHOC,CFL1,CNN3,DIAPH1,DNM2,MYO1D,NRAP,PLS3,RAC1,FSCN1,SVIL,TPM4,VASP,ZYX,LUZP1,TAGLN2,TCAP,IQGAP1,PDLIM1,TMSB10,ELMO1,ARPC2,ARPC1A,SORBS1,SWAP70,COBL,CORO1C,PDXP,INF2,XIRP1,LMOD2	35
ICM	Cytoskeleton in muscle cells	-21.9507	-21.3486	ACTA1,COL4A1,COL6A1,COL6A3,VCAN,CSRP1,DES,DIAPH1,FBLN1,FHL1,HSPG2,NRAP,SNTB2,TLN1,TPM4,VIM,ZYX,SSPN,TCAP,PDLIM1,PDLIM5,LDB3,ANKRD1,PDLIM3,PDLIM2,INF2,TMEM43,MYPN,XIRP1,LMOD2	30
ICM	regulation of supramolecular fiber organization	-10.9798	-10.457	RHOA,RHOC,CDKN1B,COL6A1,CTTN,HSPA1B,HSPA8,HSPG2,MAP1B,PFDN4,RAC1,CXCL12,SVIL,VASP,TMSB10,ARPC2,SYNPO,WDR47,SWAP70,CLASP2,SNX9,CYRIB,PDXP,SYNPO2L,LMOD2	25
ICM	regulation of cytoskeleton organization	-10.387	-9.93102	RHOA,RHOC,CDKN1B,DIAPH1,CTTN,HNRNPU,HSPA1B,LRP1,MAP1B,NUBP1,PAFAH1B1,MAPK1,RAC1,CXCL12,FSCN1,SVIL,VASP,TMSB10,ARPC2,SYNPO,WDR47,SWAP70,CLASP2,SNX9,CYRIB,PDXP,SYNPO2L,LMOD2	28
ICM	actin filament bundle assembly	-9.84647	-9.44853	ACTN1,RHOA,DNM2,PLS3,FSCN1,ZYX,LUZP1,PDLIM1,SORBS1,SWAP70,PDXP,DIAPH1,VASP,EXOC3,ARHGDIA,SNX1,RAC1	17
ICM	actin polymerization or depolymerization	-8.7229	-8.37612	ANG,CFL1,DIAPH1,RAC1,SVIL,VASP,ARPC2,COBL,INF2,LMOD2	10
ICM	positive regulation of supramolecular fiber organization	-8.61643	-8.3154	RHOA,RHOC,CDKN1B,CTTN,HSPA1B,MAP1B,RAC1,VASP,ARPC2,SYNPO,SWAP70,SNX9,PDXP,SYNPO2L,LMOD2	15
ICM	regulation of actin filament organization	-7.65509	-7.39545	RHOA,RHOC,CTTN,RAC1,CXCL12,SVIL,VASP,TMSB10,ARPC2,SYNPO,SWAP70,CLASP2,SNX9,CYRIB,PDXP,SYNPO2L,LMOD2	17
ICM	heart development	-7.1107	-6.88886	ACADM,RHOA,CDKN1B,COL6A1,CRIP1,HNRNPU,NRAP,MAPK1,MAP2K4,LUZP1,SORBS2,TCAP,PDLIM1,PDLIM5,LDB3,POFUT1,ANKRD1,HSPB7,PDCD4,PDLIM3,EGLN1,ALPK3,PDLIM2,SYNPO2L	24
ICM	myofibril assembly	-7.06777	-6.88069	ACTA1,CSRP1,NRAP,TCAP,LDB3,ANKRD1,SYNPO2L,MYPN,LMOD2	9
ICM	Focal adhesion	-6.95138	-6.79647	ACTN1,RHOA,COL4A1,COL6A1,COL6A3,DIAPH1,PPP1R12B,PPP1CB,MAPK1,RAC1,TLN1,VASP,ZYX,PPP1R12C	14
ICM	Adherens junction	-6.91183	-6.78689	ACTN1,RHOA,CSNK2A1,LMO7,MAPK1,PTPN1,RAC1,IQGAP1,SORBS1,PDCD10	10
ICM	regulation of actin filament-based process	-6.6539	-6.55699	RHOA,RHOC,CTTN,LRP1,RAC1,CXCL12,FSCN1,SVIL,VASP,TMSB10,ARPC2,SYNPO,SWAP70,CLASP2,SNX9,CYRIB,PDXP,SYNPO2L,LMOD2	19
ICM	regulation of actin polymerization or depolymerization	-5.7923	-5.72172	CTTN,CXCL12,SVIL,VASP,TMSB10,ARPC2,SWAP70,SNX9,CYRIB,PDXP,LMOD2	11
ICM	muscle tissue development	-5.36	-5.31424	ACADM,ACTA1,RHOA,COL6A1,CSRP1,HNRNPU,NRAP,MAP2K4,SVIL,SORBS2,TCAP,HOMER1,PDLIM5,ANKRD1,EGLN1,ALPK3	16
ICM	striated muscle tissue development	-5.04201	-5.01973	ACADM,ACTA1,RHOA,COL6A1,HNRNPU,NRAP,MAP2K4,SVIL,SORBS2,TCAP,HOMER1,PDLIM5,ANKRD1,EGLN1,ALPK3	15
ICM	regulation of actin filament polymerization	-3.77837	-3.77837	CTTN,SVIL,VASP,TMSB10,ARPC2,SNX9,CYRIB,LMOD2	8
